# Supplementary material for: Mitochondrial genotype influences the response to cold stress in the European green crab, Carcinus maenas
Source: Oxford University Press journal article supplement (doi:10.1242/jeb.203521), 2019-07-08
Supplement: jeb203521supp.pdf [file jeb203521supp.pdf]

### Electronic supplementary material

Table S1. PCR primers and amplification. The PCR cocktail was as follows: 12.5 ul Lucigen MasterMix 2x, 0.5 ul of forward primer (10 uM), 0.5 ul of reverse primer (10 uM), 1 ul of DNA (2 ng/ul), 10.5 ul water. Primers for nuclear markers (first two rows) were developed by the authors from previously sequenced transcriptome contigs, see Methods for details. The *mt COI* primers are published in Roman and Palumbi (2004).

| Gene          | Primers                      | Sequence                                                         | PCR product length (bp) | PCR profile                                                                                                                                                                    |
|---------------|------------------------------|------------------------------------------------------------------|-------------------------|--------------------------------------------------------------------------------------------------------------------------------------------------------------------------------|
| <i>SMC</i>    | SMC_F<br>SMC_R               | Forward: AGCACAGGAAGGCTGTGG<br>Reverse: ACGAAATCATAAGCCTCTTCACG  | 126                     | 3 min. 94°C; 17 cycles (30 sec. at 94°C, 30 sec. at 65°C [-1°C per cycle], 1.5 min. at 72°C). 20 cycles (30 sec. at 94°C, 30 sec. at 48°C. 1.5 min. at 72°C). 10 min. at 72°C. |
| <i>UBE2H</i>  | GC3546-6283F<br>GC3546-6283R | Forward: GCCATGAGCATTCTTTGAGTGG<br>Reverse: CGCAGTGGTGGAGTTTGAA  | 156                     | 3 min. 95°C; 35 cycles (1 min. at 95°C, 1 min. at 53°C, 1 min. at 72°C). 5 min. at 72°C                                                                                        |
| <i>mt-COI</i> | GC-CO1-F<br>GC-CO1-R         | Forward: GCTTGAGCTGGCATAGTAGG<br>Reverse: GAATGAGGTGTTTAGATTTTCG | 493                     | 3 min. 94°C; 30 cycles (1 min. at 94°C, 1 min. at 50°C, 1 min. at 72°C). 5 min. at 72°C.                                                                                       |

Roman, J. and Palumbi, S. R. (2004). A global invader at home: population structure of the green crab, *Carcinus maenas*, in Europe. *Molecular Ecology* **13**, 2891-2898.

Table S2. Tests of Hardy-Weinberg expectations and linkage in nuclear markers. Cells with “nv” indicate that there was insufficient variation for the test.

A. Tests of Hardy-Weinberg expectations by site.

| Site           | <i>UBE2H</i> |       | <i>SMC</i> |       |
|----------------|--------------|-------|------------|-------|
|                | $F_{IS}$     | P     | $F_{IS}$   | P     |
| Isle of Shoals | nv           | nv    | -0.077     | 1.000 |
| Harpwell       | 0.179        | 0.226 | -0.004     | 1.000 |
| Kent Island    | 0.256        | 0.117 | -0.042     | 1.000 |
| Halifax        | 0.250        | 0.575 | nv         | nv    |
| Pomquet        | 0.187        | 0.123 | -0.012     | 1.000 |

B. Tests for linkage between *UBE2H* and *SMC* by site

| Site           | P     |
|----------------|-------|
| Isle of Shoals | nv    |
| Harpwell       | 0.722 |
| Kent Island    | 0.570 |
| Halifax        | 1.000 |
| Pomquet        | 1.000 |
